# Supplementary material for: Longitudinal Analyses Reveal That Aging-related Alterations in the Intestinal Environment Lead to Gut Dysbiosis With the Potential to Induce Obesity
Source: Research Square preprint supplement (doi:10.21203/rs.3.rs-119480/v1), 2020-12-07
Supplement: Supplementary file 1 [file 327134da275e613fb4f59407.xlsx]

## Sheet: KEGG categories
Supplementary Data 2. KEGG categories of metabolites
Metabolites	KEGG categories
4-aminobutanoate	Amino acid
adenine	Nucleotide
adenosine	Nucleotide
arginine	Amino acid
alanine	Amino acid
asparagine	Amino acid
aspartate	Amino acid
n-acetylglucosamine	Carbohydrate
β-alanine	Carbohydrate
n-acetylornithine	Amino acid
allantoin	Nucleotide
p-aminobenzoate	Cofactors and vitamins
3-aminopropane-1,2-diol	Others
n-acetylputrescine	Amino acid
5-aminolevulinate	Amino acid
6-aminohexanoate	Xenobiotics
n-acetylhistidine	Others
2-aminobutanoate	Others
agmatine	Amino acid
n8-acetylspermidine	Others
2-aminophenol	Amino acid
5-aminovalerate	Amino acid
anserine	Amino acid
o-acetylcarnitine	Others
alanine-alanine	Amino acid
n-epsilon-acetyllysine	Amino acid
4-amino-3-hydroxybutyrate	Others
n-acetylvaline	Others
putrescine	Amino acid
betaine	Amino acid
choline	Lipid
creatine	Amino acid
cytidine	Nucleotide
citrulline	Amino acid
cadaverine	Amino acid
cytosine	Nucleotide
creatinine	Amino acid
carnitine	Others
cystine	Amino acid
cyclohexylamine	Xenobiotics
gamma-butyrobetaine	Amino acid
diethanolamine	Lipid
1,3-diaminopropane	Amino acid
n,n-dimethylglycine	Amino acid
2,4-diaminobutyrate	Amino acid
2'-deoxycytidine	Nucleotide
2'-deoxyguanosine	Nucleotide
5-methylthioadenosine	Amino acid
ectoine	Amino acid
glycine	Amino acid
guanine	Nucleotide
guanosine	Nucleotide
glutamine	Amino acid
glutamate	Amino acid
guanidinoacetate	Amino acid
gamma-guanidinobutyrate	Amino acid
glycine-glycine	Others
glutamate-glutamate	Others
glucosamine	Carbohydrate
glucosaminate	Carbohydrate
glycerophosphorylcholine	Lipid
guanidinosuccinate	Others
histidine	Amino acid
homoserine	Amino acid
hydroxyproline	Others
hypoxanthine	Nucleotide
4-hydroxymethylimidazole	Others
5-hydroxyindoleacetate	Amino acid
histamine	Amino acid
5-hydroxylysine	Amino acid
histidinol	Amino acid
inosine	Nucleotide
isoleucine	Amino acid
isopropanolamine	Amino acid
imidazole-4-acetate	Amino acid
indole-3-ethanol	Amino acid
isoamylamine	Others
leucine	Amino acid
lysine	Amino acid
lysinamide	Others
methionine	Amino acid
methylguanidine	Others
n-methylalanine	Others
7-methylguanine	Others
1-methyladenosine	Others
1-methylnicotinamide	Cofactors and vitamins
3-methylhistidine	Amino acid
mannosamine	Others
methionine sulfoxide	Amino acid
nicotinamide	Cofactors and vitamins
nornicotine	Others
n6,n6,n6-trimethyllysine	Amino acid
ornithine	Amino acid
octopine	Amino acid
ophthalmate	Others
phenylalanine	Amino acid
proline	Amino acid
pyridoxal	Cofactors and vitamins
phenethylamine	Amino acid
pipecolate	Amino acid
pyridoxine	Cofactors and vitamins
5-oxoproline	Amino acid
pyridoxamine 5'-phosphate	Cofactors and vitamins
pyridoxamine	Cofactors and vitamins
serine	Amino acid
spermidine	Amino acid
tyrosine	Amino acid
triptophane	Amino acid
taurine	Amino acid
tyramine	Amino acid
threonine	Amino acid
thymidine	Nucleotide
thymine	Nucleotide
tryptamine	Amino acid
trimethylamine n-oxide	Energy
thiamine	Cofactors and vitamins
uracil	Nucleotide
urea	Nucleotide
uridine	Nucleotide
urocanate	Amino acid
valine	Amino acid
xanthine	Nucleotide
xanthosine	Nucleotide
adenosine monophosphate	Nucleotide
n-acetylneuraminate	Carbohydrate
Adenosine diphosphate	Energy
n-acetylglutamate	Amino acid
argininosuccinate	Amino acid
azelate	Others
n-acetylmethionine	Others
adipate	Xenobiotics
4-acetylbutyrate	Others
n-acetylglucosamine 1-phosphate	Carbohydrate
allantoate	Nucleotide
n-acetylaspartate	Amino acid
n-acetylleucine	Others
n-acetylmuramate	Carbohydrate
butyrate	Carbohydrate
citrate	Energy
cysteate	Amino acid
hexanoate	Others
citraconate	Carbohydrate
cholate	Lipid
cysteine s-sulfate	Amino acid
cumate	Xenobiotics
dodecanedioate	Others
digalacturonate	Carbohydrate
2-deoxyglucose 6-phosphate	Others
fumarate	Energy
glucuronate	Carbohydrate
glycolate	Xenobiotics
glyoxylate	Carbohydrate
glycerate	Carbohydrate
glycerophosphate	Lipid
glutarate	Lipid
o-hydroxybenzoate	Xenobiotics
3-hydroxybutyrate	Carbohydrate
2-hydroxybutyrate	Carbohydrate
2-hydroxyisobutyrate	Others
3-hydroxypropionate	Carbohydrate
3-methylbutanoate	Carbohydrate
2-isopropylmalate	Carbohydrate
lactate	Carbohydrate
4-oxopentanoate	Others
malate	Energy
4-methyl-2-oxopentanoate	Amino acid
mucate	Carbohydrate
nicotinate	Cofactors and vitamins
propionate	Carbohydrate
pantothenate	Amino acid
phenaceturate	Amino acid
o-phosphoserine	Amino acid
pimelate	Cofactors and vitamins
phthalate	Xenobiotics
3-phenylpropionate	Amino acid
3-phenyllactate	Amino acid
quinate	Amino acid
ribulose 5-phosphate	Carbohydrate
succinate	Energy
sebacate	Others
saccharate	Carbohydrate
udp-n-acetylglucosamine	Carbohydrate
Uridine monophosphate	Nucleotide
pentanoate	Others
ribose	Carbohydrate
xylitol	Carbohydrate
rhamnose	Carbohydrate
fructose	Carbohydrate
sorbitol	Carbohydrate
sucrose	Carbohydrate
maltose	Carbohydrate
inositol	Carbohydrate
maltotriose	Others
stachyose	Carbohydrate
panose	Others
raffinose	Carbohydrate
arabinose	Others
xylose	Carbohydrate
arabitol	Carbohydrate
mannose	Carbohydrate
galactose	Carbohydrate
glucose	Carbohydrate
mannitol	Carbohydrate
trehalose	Carbohydrate
1-methylhistamine	Amino acid
2-cyanopyridine	Others
2-hydroxypentanoate	Others
2-oxoglutarate	Carbohydrate
2-oxoisopentanoate	Amino acid
3-indoxyl sulfate	Others
3-phosphoglycerate	Carbohydrate
3-ureidopropionate	Nucleotide
5-methoxy-3-indoleaceate	Others
acetohydroxamate	Others
alpha-aminoadipate	Amino acid
benzoate	Xenobiotics
carnosine	Amino acid
cis-aconitate	Energy
citramalate	Carbohydrate
cysteine-glutathione disulphide -divalent	Others
ethanolamine phosphate	Lipid
fructose 6-phosphate	Energy
glucose 1-phosphate	Carbohydrate
glucose 6-phosphate	Carbohydrate
glycocholate	Lipid
hippurate	Amino acid
hypotaurine	Amino acid
indole-3-acetaldehyde	Amino acid
isethionate	Amino acid
isocitrate	Energy
malonate	Nucleotide
n-methylglutamate	Energy
pargyline	Others
phosphoenol pyruvate	Energy
phosphorylcholine	Lipid
pyruvate	Carbohydrate
ribose-5-phosphate	Carbohydrate
sedoheptulose-7-phosphate	Carbohydrate
taurocholate	Lipid
terephthalate	Xenobiotics
triethanolamine	Lipid
trigonelline	Cofactors and vitamins
urate	Nucleotide
